# Supplementary material for: Multidrug-Resistant Coagulase-Negative Staphylococci Isolated from Bloodstream in the uMgungundlovu District of KwaZulu-Natal Province in South Africa: Emerging Pathogens
Source: PubMed Central journal article supplement (PMC7922184; doi:10.3390/antibiotics10020198), 2021-02-18
Supplement: antibiotics-10-00198-s001.pdf [file antibiotics-10-00198-s001.pdf]

Article

# Multidrug-Resistant Coagulase-Negative Staphylococci Isolated from Bloodstream in the uMgungundlovu District of KwaZulu-Natal Province in South Africa: Emerging Pathogens

Jonathan Asante <sup>1,2,\*</sup>, Bakoena A. Hetsa <sup>1,2</sup>, Daniel G. Amoako <sup>1,3</sup>, Akebe Luther King Abia <sup>1</sup>, Linda A. Bester <sup>4</sup> and Sabiha Y. Essack <sup>1</sup>

<sup>1</sup> Antimicrobial Research Unit, College of Health Sciences, University of KwaZulu-Natal, Durban 4000, South Africa; hetszab@gmail.com (B.A.H.); amoakodg@gmail.com (D.G.A.); lutherkinga@yahoo.fr (A.L.K.A.); essacks@ukzn.ac.za (S.Y.E.)

<sup>2</sup> School of Laboratory Medicine and Medical Sciences, University of KwaZulu-Natal, Durban 4000, South Africa

<sup>3</sup> Centre for Respiratory Diseases and Meningitis, National Institute for Communicable Diseases, Johannesburg 2131, South Africa

<sup>4</sup> Biomedical Research Unit, University of KwaZulu-Natal, Durban 4000, South Africa; besterl@ukzn.ac.za

\* Correspondence: josante33@yahoo.com

**Table S1.** Detailed phenotypic and *mecA* profile of isolates.

| Isolate ID | CoNS Species                  | Ward Type            | <i>MecA</i> | Antibiotic Resistance Profile |     |     |     |     |     |     |     |     |     |     |     |     |     |     |     |     |     |     |   |
|------------|-------------------------------|----------------------|-------------|-------------------------------|-----|-----|-----|-----|-----|-----|-----|-----|-----|-----|-----|-----|-----|-----|-----|-----|-----|-----|---|
|            |                               |                      |             | FOX                           | PEN | CPT | CIP | MXF | AZM | ERY | GEN | AMK | CHL | TET | DOX | TEC | TGC | LZD | CLI | RIF | SXT | NIT |   |
| C1         | <i>S. epidermidis</i>         | Paediatric OPD       | NA          |                               | R   |     |     |     |     |     |     |     |     |     |     |     |     |     |     |     | R   |     |   |
| C3         | <i>S. epidermidis</i>         | Ward & nursery       | -           | R                             | R   |     | R   | R   | R   | R   | R   |     |     |     |     |     |     |     |     | R   |     | R   |   |
| C4         | <i>S. epidermidis</i>         | A1 paediatric ward   | -           | R                             | R   |     | R   | R   | R   | R   |     |     | R   |     |     |     |     |     |     | R   | R   | R   |   |
| C5         | <i>S. hominis ssp hominis</i> | Paediatric OPD       | NA          |                               | R   |     |     |     | R   | R   |     |     | R   |     |     |     |     |     |     | R   |     | R   |   |
| C6         | <i>S. epidermidis</i>         | Emergency department | NA          |                               | R   | R   |     |     |     |     |     |     | R   |     |     |     |     |     |     |     | R   |     | R |
| C7         | <i>S. haemolyticus</i>        | 3N ICU               | +           | R                             | R   |     | R   | R   | R   | R   |     |     |     |     |     |     |     |     |     | R   | R   |     |   |

|     |                               |                    |    |   |   |   |   |   |   |   |   |   |   |   |   |   |   |   |   |
|-----|-------------------------------|--------------------|----|---|---|---|---|---|---|---|---|---|---|---|---|---|---|---|---|
| C9  | <i>S. epidermidis</i>         | -                  | +  | R | R | R | R | R | R | R | R | R | R | R | R | R | R | R | R |
| C10 | <i>S. haemolyticus</i>        | ICU                | +  | R | R | R | R | R | R | R | R | R | R | R | R | R | R | R | R |
| C11 | <i>S. hominis ssp hominis</i> | Casualty           | NA |   | R |   |   |   |   |   |   |   |   |   |   |   |   |   | R |
| C13 | <i>S. hominis ssp hominis</i> | Neonatal ICU       | +  | R | R | R | R | R | R | R | R | R | R | R | R | R | R | R | R |
| C17 | <i>S. hominis ssp hominis</i> | H1 Medical ward    | +  | R | R |   | R | R | R |   | R |   |   |   |   |   |   |   | R |
| C18 | <i>S. haemolyticus</i>        | KMMC Clinic        | NA |   | R |   |   |   | R | R |   |   |   |   |   |   |   |   | R |
| C19 | <i>S. epidermidis</i>         | Neonatal ICU       | +  | R | R |   |   |   | R | R |   |   |   |   |   |   |   |   | R |
| C20 | <i>S. hominis ssp hominis</i> | H2 Medical ward    | NA |   | R | R |   | R |   |   |   | R | R | R | R | R | R | R | R |
| C21 | <i>S. sciuri</i>              | ICU                | +  | R | R |   | R | R | R | R |   |   |   |   |   |   |   | R | R |
| C22 | <i>S. lentus</i>              | Ward D             | +  | R | R |   | R | R | R | R |   | R | R |   |   |   |   | R | R |
| C23 | <i>S. lentus</i>              | Paediatric OPD     | NA |   | R |   |   |   |   |   |   |   |   |   |   |   |   |   |   |
| C26 | <i>S. lentus</i>              | -                  | +  | R | R |   |   |   |   |   |   |   |   |   |   |   |   |   |   |
| C27 | <i>S. haemolyticus</i>        | Ward D             | +  | R | R |   |   |   |   |   | R | R | R | R | R | R | R | R | R |
| C31 | <i>S. haemolyticus</i>        | A1 Paediatric ward | +  | R | R |   |   |   | R | R |   |   |   |   |   |   |   |   |   |
| C32 | <i>S. sciuri</i>              | E2 Paediatric ICU  | +  | R | R |   | R | R | R | R |   |   |   |   |   |   |   | R | R |
| C35 | <i>S. saprophyticus</i>       | E1 Paediatric ward | +  | R | R | R | R | R | R | R |   | R | R | R |   |   |   | R | R |
| C36 | <i>S. saprophyticus</i>       | Neonatal ICU       | +  | R | R |   | R |   | R | R |   | R | R | R | R | R | R | R | R |
| C37 | <i>S. lentus</i>              | Neonatal ICU       | NA |   | R |   | R | R | R | R |   | R |   |   |   |   |   | R | R |
| C38 | <i>S. epidermidis</i>         | H2 Medical ward    | +  | R | R |   | R | R | R | R |   |   |   |   |   |   |   |   | R |
| C39 | <i>S. lentus</i>              | 5B2 Medical ward   | +  | R | R |   | R | R | R | R |   | R | R | R |   |   |   | R | R |
| C40 | <i>S. hominis ssp hominis</i> | 3N Extension ward  | +  | R | R |   |   | R | R | R |   |   |   |   |   |   |   |   | R |
| C42 | <i>S. haemolyticus</i>        | 5F Medical ward    | +  | R | R |   | R | R | R | R |   | R | R |   |   |   |   | R | R |

|     |                               |                                  |    |   |   |   |   |   |   |   |   |   |   |       |
|-----|-------------------------------|----------------------------------|----|---|---|---|---|---|---|---|---|---|---|-------|
| C43 | <i>S. lentus</i>              | D1 Medical ward                  | +  | R | R |   | R | R | R | R | R | R | R |       |
| C44 | <i>S. gallinarum</i>          | WARD E                           | +  | R | R |   |   |   |   |   |   |   |   |       |
| C47 | <i>S. hominis ssp hominis</i> | D1 Medical ward                  | +  | R | R |   |   |   | R | R |   |   |   | R     |
| C48 | <i>S. hominis ssp hominis</i> | 3F Obstetrics & Gynaecology ward | +  | R | R |   |   |   | R | R |   |   |   | R     |
| C49 | <i>S. capitis</i>             | 3N Extension ward                | +  | R | R |   | R | R | R | R |   | R |   | R R   |
| C53 | <i>S. lentus</i>              | 3N Main                          | -  | R | R |   |   |   | R | R |   |   |   | R R R |
| C54 | <i>S. haemolyticus</i>        | 3N Extension ward                | +  | R | R |   | R | R | R | R |   |   |   | R R   |
| C55 | <i>S. lentus</i>              | Ward & Nursery                   | NA |   | R |   |   |   | R | R |   |   |   |       |
| C56 | <i>S. lentus</i>              | E1 Paediatric ward               | +  | R | R | R |   | R | R | R |   | R | R | R     |
| C57 | <i>S. epidermidis</i>         | 7B2 Extension ward               | -  | R | R | R | R | R | R | R |   | R | R | R     |
| C58 | <i>S. epidermidis</i>         | Surgical OPD                     | +  | R | R |   | R | R | R | R |   | R | R | R     |
| C61 | <i>S. haemolyticus</i>        | D1 Medical ward                  | +  | R | R |   | R | R | R |   |   |   |   | R R   |
| C66 | <i>S. lentus</i>              | Paediatric OPD                   | NA |   | R | R |   |   |   |   |   |   |   | R     |
| C68 | <i>S. epidermidis</i>         | 7F Paediatric ward               | +  | R | R |   |   |   | R | R |   | R | R | R     |
| C72 | <i>S. lentus</i>              | 2R Surgical ICU                  | NA |   | R |   |   |   |   |   |   |   |   |       |
| C73 | <i>S. lentus</i>              | Ward F                           | NA |   | R |   |   |   |   |   |   |   |   | R     |
| C74 | <i>S. epidermidis</i>         | Paediatric OPD                   | NA |   | R |   |   | R |   |   |   |   |   | R     |
| C75 | <i>S. lugdunensis</i>         | -                                | NA |   | R |   |   |   |   |   |   |   |   |       |
| C81 | <i>S. hominis ssp hominis</i> | F2 Surgical ward                 | +  | R | R |   | R | R | R | R |   |   |   | R R R |
| C87 | <i>S. auricularis</i>         | 3N Main                          | +  | R | R |   |   |   | R | R |   | R |   | R     |
| C93 | <i>S. lentus</i>              | H1 Medical ward                  | +  | R | R |   | R | R | R | R |   | R |   | R R R |

|      |                               |                             |    |   |   |   |   |   |   |   |   |   |   |   |
|------|-------------------------------|-----------------------------|----|---|---|---|---|---|---|---|---|---|---|---|
| C100 | <i>S. haemolyticus</i>        | Emergency department        | +  | R | R |   |   | R | R |   |   |   |   | R |
| C102 | <i>S. haemolyticus</i>        | Paediatric OPD              | +  | R | R |   | R | R | R | R |   | R | R | R |
| C104 | <i>S. capitis</i>             | 7F Paediatric ward          | NA |   | R |   | R | R | R | R |   | R |   | R |
| C105 | <i>S. hominis ssp hominis</i> | Paediatric OPD              | NA | R | R |   | R |   | R | R |   | R |   | R |
| C107 | <i>S. lugdunensis</i>         | -                           | NA |   | R |   |   |   |   |   |   |   |   |   |
| C110 | <i>S. xylosus</i>             | H2 Medical ward             | +  | R | R |   |   |   |   | R | R |   | R |   |
| C113 | <i>S. xylosus</i>             | Medical OPD                 | +  | R | R |   |   | R | R |   |   |   |   | R |
| C114 | <i>S. sciuri</i>              | Medical OPD                 | NA |   | R |   |   | R | R |   |   |   |   |   |
| C116 | <i>S. hominis ssp hominis</i> | Paediatric OPD              | NA |   | R |   |   | R | R |   |   |   |   | R |
| C118 | <i>S. hominis ssp hominis</i> | Ward D                      | +  | R | R | R |   | R | R |   | R | R |   | R |
| C119 | <i>S. xylosus</i>             | 2F Paediatric ICU           | +  | R | R | R |   | R | R |   | R | R |   | R |
| C120 | <i>S. gallinarum</i>          | Paediatric OPD              | +  | R | R |   |   | R | R |   | R |   |   | R |
| C121 | <i>S. hominis ssp hominis</i> | E1 Paediatric ward          | +  | R | R |   |   |   |   |   |   |   |   | R |
| C122 | <i>S. hominis ssp hominis</i> | Paediatric OPD              | +  | R | R |   |   |   |   |   |   |   |   | R |
| C123 | <i>S. haemolyticus</i>        | Emergency And Accident Unit | NA |   | R |   |   | R | R |   |   |   |   |   |
| C125 | <i>S. arlettae</i>            | KMMC Clinic                 | +  | R | R |   |   | R | R |   | R |   |   | R |
| C126 | <i>S. epidermidis</i>         | 1F Male surgical Ward       | NA |   | R |   |   |   |   |   |   |   |   |   |
| C127 | <i>S. hominis</i>             | 1F Male Surgical ward       | +  | R | R |   |   | R | R |   |   |   |   | R |
| C128 | <i>S. hominis</i>             | 1F Male surgical Ward       | +  | R | R |   | R | R | R | R |   |   | R | R |

|      |                         |                             |    |   |   |   |   |   |   |   |   |   |   |
|------|-------------------------|-----------------------------|----|---|---|---|---|---|---|---|---|---|---|
| C129 | <i>S. haemolyticus</i>  | 1F Male Surgical ward       | +  | R | R | R | R | R | R | R | R | R | R |
| C131 | <i>S. sciuri</i>        | Emergency and Accident Unit | +  | R | R | R | R | R | R | R | R | R | R |
| C132 | <i>S. sciuri</i>        | C2 Surgical ward            | +  | R | R | R | R | R | R | R | R | R | R |
| C133 | <i>S. epidermidis</i>   | Paediatric OPD              | +  | R | R |   |   |   |   |   |   |   | R |
| C134 | <i>S. epidermidis</i>   | Casualty                    | +  | R | R | R | R | R | R | R | R | R | R |
| C135 | <i>S. saprophyticus</i> | Paediatric OPD              | +  | R | R | R | R | R | R | R | R | R | R |
| C136 | <i>S. succinus</i>      | H Ward                      | NA |   | R |   |   | R | R |   |   |   | R |
| C137 | <i>S. epidermidis</i>   | Ward O                      | +  | R | R | R | R | R | R |   |   | R | R |
| C138 | <i>S. hominis</i>       | H Ward                      | +  | R | R |   |   |   |   |   |   |   | R |
| C139 | <i>S. succinus</i>      | 3N Extension ward           | +  | R | R |   |   | R | R | R |   | R | R |
| C141 | <i>S. haemolyticus</i>  | 3N Extension ward           | +  | R | R | R | R |   | R |   |   |   | R |
| C142 | <i>S. succinus</i>      | Paediatric OPD              | +  | R | R |   |   |   |   |   |   |   | R |
| C143 | <i>S. warneri</i>       | 3N ICU                      | +  | R | R |   |   | R | R |   | R |   | R |
| C144 | <i>S. epidermidis</i>   | 3N Extension ward           | +  | R | R | R | R | R | R | R |   | R | R |
| C145 | <i>S. epidermidis</i>   | Casualty                    | +  | R | R |   |   | R | R |   | R |   |   |
| C146 | <i>S. haemolyticus</i>  | Paediatric ward             | +  | R | R |   |   |   |   |   |   |   | R |
| C147 | <i>S. xylosus</i>       | Ward and Nursery            | +  | R | R | R | R | R | R | R |   | R | R |
| C148 | <i>S. xylosus</i>       | D5 Ward                     | +  | R | R |   |   | R | R |   |   |   |   |
| C149 | <i>S. hominis</i>       | KMMC Clinic                 | +  | R | R |   |   | R | R |   |   |   | R |
| C150 | <i>S. succinus</i>      | Paediatric OPD              | +  | R | R |   |   | R | R | R | R | R | R |
| C151 | <i>S. haemolyticus</i>  | E1 Paediatric Ward          | +  | R | R | R | R | R | R |   |   |   | R |
| C152 | <i>S. haemolyticus</i>  | ICU                         | +  | R | R | R | R |   |   |   |   |   | R |

---

---

Abbreviations: FOX, cefoxitin; PEN, penicillin G; CPT, ceftaroline; CIP, ciprofloxacin; MXF, moxifloxacin; AZM, azithromycin; ERY, erythromycin; GEN, gentamicin; AMK, amikacin; CHL, chloramphenicol; TET, tetracycline; DOX, doxycycline; TEC, teicoplanin; TGC, tigecycline; LZD, linezolid; CLI, clindamycin; RIF, rifampicin; SXT, sulphamethoxazole/trimethoprim; NIT, nitrofurantoin; R, resistant; OPD, Outpatient Department; ICU, Intensive Care Unit; +, present; -, absent; NA: Not applicable.
